# Supplementary material for: Simultaneous detection of carcinoembryonic antigen and neuron-specific enolase in human serum based on time-resolved chemiluminescence immunoassay
Source: Royal Society of Chemistry journal article supplement (doi:10.1039/c9an00910h), 2019-01-01
Supplement: c9an00910h1.pdf [file c9an00910h1.pdf]

## Supplementary Materials

### Simultaneous detection of carcinoembryonic antigen and neuron specific enolase in human serum based on time-resolved chemiluminescence immunoassay

Yanhua Mao<sup>a,b</sup>, Nana Wang<sup>b</sup>, Fei Yu<sup>a</sup>, Songcheng Yu<sup>a</sup>, Lie Liu<sup>a</sup>, Yongmei Tian<sup>a</sup>, Jia Wang<sup>a</sup>, Yilin Wang<sup>a</sup>, Leiliang He<sup>a\*</sup>, Yongjun Wu<sup>a, c\*</sup>

- a. College of Public Health, Zhengzhou University, Zhengzhou 450001, People's Republic of China.
- b. College of Chemistry and Molecular Engineering, Zhengzhou University, Zhengzhou 450001, People's Republic of China.
- c. The Key Laboratory of Nanomedicine and Health Inspection of Zhengzhou, Zhengzhou 450001, China.

\*Corresponding Authors:

Leiliang He, email: hell19841011@126.com;

Yongjun Wu, email: wuyongjun@zzu.edu.cn.

Contents:

- S-1. Buffer solution.
- S-2. Optimization of the concentration luminol, H<sub>2</sub>O<sub>2</sub> and BIP.
- S-3. Optimization the concentration of AMPPD.
- S-4. Selection of coated buffer.
- S-5. Detailed results detected by TRCLIA and CLEIA kits.
- S-6. Comparison of the proposed method with other methods.

### **S-1 Buffer solution**

The buffer solution used in the experiment were as follows: coated buffer 0.10 mol L<sup>-1</sup> Tris-HCl (pH 8.5), 0.01 mol L<sup>-1</sup> PBS (pH 7.4), 0.01 mol L<sup>-1</sup> Tris-HCl (pH 10.2), 0.01 mol L<sup>-1</sup> MES (pH 6.0), PBST (0.01 mol L<sup>-1</sup> PBS containing 0.05% Tween-20, pH 7.4), PBS/BSA (0.01 mol L<sup>-1</sup> PBS containing 0.5% BSA, pH 7.4).

## S-2. Optimization of the concentration luminol, H<sub>2</sub>O<sub>2</sub> and BIP.

As shown in the Fig. S1A, chemiluminescence intensity (RLU) was the highest when the concentration of luminol was 1.4 mmol L<sup>-1</sup>. Therefore, 1.4 mmol L<sup>-1</sup> luminol was selected for further study. In the same way, 3.0 mmol L<sup>-1</sup> H<sub>2</sub>O<sub>2</sub> (Fig. S1B) and 7.5 × 10<sup>-2</sup> mmol L<sup>-1</sup> BIP were used in further investigations (Fig.S1C).

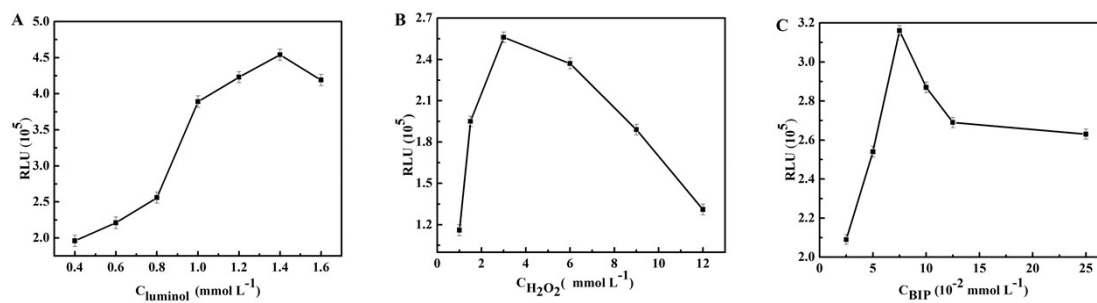

**Fig. S1.** Single factor optimization of the HRP-luminol-H<sub>2</sub>O<sub>2</sub>-BIP system under different concentration of luminol (A), H<sub>2</sub>O<sub>2</sub> (B) and BIP (C).

### S-3. Optimization the concentration of AMPPD.

The influence of AMPPD of different concentration on CL signals is shown in the Fig. S2. Within the concentration range of 5.0-25 mmol L<sup>-1</sup>, RLU increased with the increase of AMPPD concentration. When the concentration exceeded 25 mmol L<sup>-1</sup>, RLU was basically unchanged. Therefore, 25 mmol L<sup>-1</sup> was selected as the optimal concentration of AMPPD.

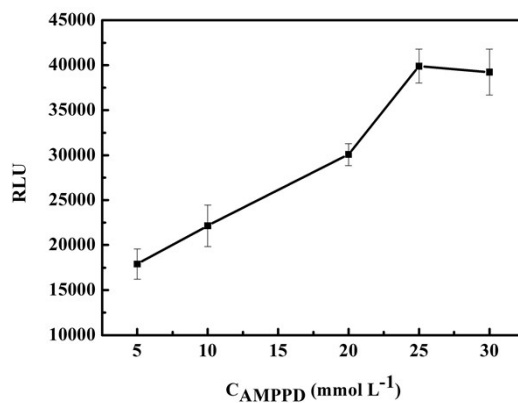

Fig. S2. Optimization of ALP-AMPPD system under different concentrations of AMPPD

#### S-4. Selection of coated buffer.

In this experiment, PBS (0.01 mol L<sup>-1</sup>, pH 7.2), carbonic acid buffer (CB) (0.05 mol L<sup>-1</sup>, pH 9.6), Tris-HCl (0.1 mol L<sup>-1</sup>, pH 8.5) and Tris-HCl (0.01 mol L<sup>-1</sup>, pH 10.2) were selected for investigation. As can be seen from Fig.S3, HRP and ALP systems had weak signal-to-noise ratio in PBS. In CB and Tris-HCl (pH 10.2), the signal-to-noise ratios of HRP system were significantly different from those of ALP system. Only Tris-HCl (pH 8.5) was more compatible with the mixed system. Therefore, Tris-HCl (pH 8.5) was finally selected as the coated buffer.

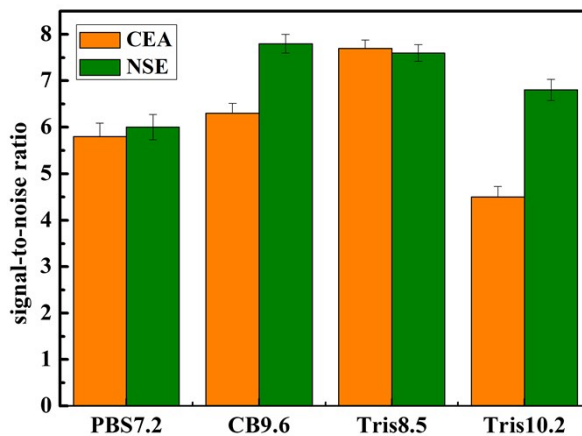

**Fig.S3.** Influence of the CEA mAbs@CPSMS or NSE mAbs@CPSMS coated buffer on the signal-blank-ratio for CEA and NSE detections.

## S-5. Detailed results detected by TRCLIA and CLEIA kits.

**Table S1** Detailed results detected by TRCLIA and CLEIA kits.

| Serum samples | CEA <sub>CLEIA kit</sub> (ng mL <sup>-1</sup> ) | CEA <sub>TRCLIA</sub> (ng mL <sup>-1</sup> ) | NSE <sub>CLEIA kit</sub> (ng mL <sup>-1</sup> ) | NSE <sub>TRCLIA</sub> (ng mL <sup>-1</sup> ) | Serum samples | CEA <sub>CLEIA kit</sub> (ng mL <sup>-1</sup> ) | CEA <sub>TRCLIA</sub> (ng mL <sup>-1</sup> ) | NSE <sub>CLEIA kit</sub> (ng mL <sup>-1</sup> ) | NSE <sub>TRCLIA</sub> (ng mL <sup>-1</sup> ) |
|---------------|-------------------------------------------------|----------------------------------------------|-------------------------------------------------|----------------------------------------------|---------------|-------------------------------------------------|----------------------------------------------|-------------------------------------------------|----------------------------------------------|
| 1             | 0.95                                            | 1.12                                         | 29.21                                           | 25.18                                        | 24            | 1.79                                            | 1.68                                         | 35.09                                           | 36.78                                        |
| 2             | 1.94                                            | 1.69                                         | 37.61                                           | 41.92                                        | 25            | 1.59                                            | 1.33                                         | 17.74                                           | 19.25                                        |
| 3             | 0.88                                            | 0.95                                         | 51.57                                           | 47.54                                        | 26            | 2.15                                            | 2.03                                         | 54.91                                           | 56.31                                        |
| 4             | 2.09                                            | 2.28                                         | 28.97                                           | 26.47                                        | 27            | 3.72                                            | 3.55                                         | 40.61                                           | 38.86                                        |
| 5             | 3.43                                            | 3.31                                         | 36.27                                           | 39.03                                        | 28            | 2.59                                            | 2.67                                         | 47.96                                           | 49.07                                        |
| 6             | 5.08                                            | 5.31                                         | 25.30                                           | 23.17                                        | 29            | 3.26                                            | 3.11                                         | 69.73                                           | 73.03                                        |
| 7             | 2.75                                            | 2.89                                         | 9.23                                            | 11.97                                        | 30            | 1.05                                            | 0.89                                         | 34.79                                           | 35.19                                        |
| 8             | 3.25                                            | 3.14                                         | 34.86                                           | 30.79                                        | 31            | 0.01                                            | 0.23                                         | 25.41                                           | 26.38                                        |
| 9             | 2.25                                            | 2.18                                         | 46.35                                           | 49.39                                        | 32            | 0.81                                            | 0.88                                         | 53.58                                           | 50.78                                        |
| 10            | 1.32                                            | 1.23                                         | 23.61                                           | 20.88                                        | 33            | 2.82                                            | 2.93                                         | 41.96                                           | 41.24                                        |
| 11            | 0.64                                            | 0.45                                         | 44.04                                           | 47.25                                        | 34            | 2.15                                            | 2.04                                         | 17.36                                           | 18.03                                        |
| 12            | 0.81                                            | 0.69                                         | 43.16                                           | 40.15                                        | 35            | 0.65                                            | 0.77                                         | 36.22                                           | 35.07                                        |
| 13            | 0.71                                            | 0.58                                         | 56.83                                           | 51.53                                        | 36            | 3.43                                            | 3.29                                         | 21.15                                           | 22.71                                        |
| 14            | 0.74                                            | 0.86                                         | 53.11                                           | 50.61                                        | 37            | 2.02                                            | 2.25                                         | 28.62                                           | 27.00                                        |
| 15            | 3.00                                            | 3.17                                         | 47.63                                           | 49.43                                        | 38            | 1.21                                            | 1.09                                         | 33.82                                           | 35.14                                        |
| 16            | 1.15                                            | 1.23                                         | 95.30                                           | 109.20                                       | 39            | 1.46                                            | 1.34                                         | 32.91                                           | 31.01                                        |
| 17            | 2.40                                            | 2.34                                         | 47.38                                           | 51.15                                        | 40            | 1.33                                            | 1.42                                         | 7.88                                            | 8.46                                         |
| 18            | 5.68                                            | 5.41                                         | 108.10                                          | 96.80                                        | 41            | 0.62                                            | 0.75                                         | 6.96                                            | 7.11                                         |
| 19            | 0.47                                            | 0.60                                         | 35.07                                           | 37.49                                        | 42            | 1.39                                            | 1.50                                         | 78.71                                           | 82.96                                        |
| 20            | 2.38                                            | 2.54                                         | 51.30                                           | 54.80                                        | 43            | 3.29                                            | 3.41                                         | 17.95                                           | 14.68                                        |
| 21            | 2.33                                            | 2.25                                         | 80.08                                           | 75.09                                        | 44            | 2.06                                            | 1.95                                         | 54.42                                           | 58.93                                        |
| 22            | 3.22                                            | 3.11                                         | 81.53                                           | 86.47                                        | 45            | 1.10                                            | 1.21                                         | 40.60                                           | 43.10                                        |
| 23            | 1.46                                            | 1.59                                         | 25.78                                           | 24.15                                        |               |                                                 |                                              |                                                 |                                              |

## S-6. Comparison of the proposed method with other methods.

Table S2 Comparison of the proposed method with other methods.

| Methods                                                    | RSD (%)        |                | limits of detection (ng mL <sup>-1</sup> ) |              | Refs             |
|------------------------------------------------------------|----------------|----------------|--------------------------------------------|--------------|------------------|
|                                                            | CEA            | NSE            | CEA                                        | NSE          |                  |
| Immunomagnetic Nanobeads/lateral flow test strip           | 2.5-5.2        | 2.7-5.9        | 0.045                                      | 0.094        | 1                |
| Fluorescence quantum dots                                  | 0.53           | 0.53           | 1.0                                        | 1.0          | 2                |
| Microarray/gold nanoparticles                              | —              | —              | 0.75                                       | 0.98         | 3                |
| Fluorescence immunoassay                                   | 2.23-5.13      | 0.09-6.36      | 0.625                                      | 0.625        | 4                |
| AuNPs/tryptophan and caffeic acid-based resin microspheres | 5.9            | 7.9            | 0.11                                       | 0.08         | 5                |
| <b>Time-resolved chemiluminescence immunoassay</b>         | <b>4.8-9.0</b> | <b>2.3-4.3</b> | <b>0.085</b>                               | <b>0.044</b> | <b>This work</b> |

## References

- 1 W. Lu, K. Wang, K. Xiao, W. Qin, Y. Hou, H. Xu, X. Yan, Y. Chen, D. Cui and J. He, *Sci. Rep.*, 2017, **7**, 42414.
- 2 H. Li, Z. Cao, Y. Zhang, C. Lau and J. Lu, *Analyst*, 2011, **136**, 1399-1405.
- 3 W. Gao, W. Wang, S. Yao, S. Wu, H. Zhang, J. Zhang, F. Jing, H. Mao, Q. Jin, H. Cong, C. Jia, G. Zhang and J. Zhao, *Anal. Chim. Acta*, 2017, **958**, 77-84.
- 4 Z. Cao, H. Li, C. Lau, Y. Zhang, *Anal. Chim. Acta*, 2011, **698**, 44– 50.
- 5 W. Lu, L. Tao, Y. Wang, X. Cao, J. Ge, J. Dong and W. Qian, *Ionics*, 2014, **21**, 1141-1152.
